# Supplementary material
Source: Elsevier journal article supplement (https://www.sciencedirect.com/science/article/pii/S0300289622005877)

## EDITORIAL

### Ningún hospital sin Unidad de Cuidados Respiratorios Intermedios

#### **Autores:**

Olga Mediano<sup>a,b,c</sup>, Manel Luján<sup>a,d</sup>, Sonia López-Monzoni<sup>b</sup>.

#### **Filiación:**

<sup>a</sup>Centro de Investigación Biomédica en Red de Enfermedades Respiratorias (CIBERES), Madrid, España.

<sup>b</sup>Servicio de Neumología, Hospital Universitario de Guadalajara, Guadalajara, España.

<sup>c</sup>Departamento de Medicina, Universidad de Alcalá, Alcalá de Henares, Madrid, España.

<sup>d</sup>Servicio de Neumología, Hospital Universitario Parc Taulí, Sabadell, Barcelona, España.

#### **Autora de correspondencia:**

Olga Mediano

Hospital Universitario de Guadalajara.

Calle Donantes de Sangre, sn. 19002. Guadalajara, España.

e-mail: [olgamediano@hotmail.com](mailto:olgamediano@hotmail.com)

**Conflicto de intereses:** Ninguno.

**Financiación:** Los autores de este editorial no han recibido ayudas específicas provenientes de agencias del sector público, sector comercial o entidades sin ánimo de lucro para la elaboración de este manuscrito.

**Agradecimientos:** a David Díaz-Pérez por la cesión de la fotografía que aparece en la mitad superior de la figura 1.

La naturaleza del ser humano y su estructura en sociedades conceden a las enfermedades infecciosas una capacidad de transmisión que, a veces, se escapa a su control. Esto se pone de máxima relevancia durante su progresión a epidemias o pandemias y, para hacerles frente, a menudo son necesarias innovaciones científicas que deben ir ligadas a transformaciones sociales.

Como ocurriera en la epidemia de la polio en la primera mitad del SXX, en esta pandemia por COVID-19, el soporte respiratorio no invasivo (SRNI) se ha convertido en el salvavidas de muchos pacientes que, de lo contrario, hubieran estado condenados al fracaso respiratorio y finalmente a la muerte. El conocido como “pulmón de acero”, desarrollado por Drinker-Shaw en 1928, fue el primer respirador eléctrico a presión negativa usado exitosamente y de forma generalizada en la práctica clínica<sup>1</sup>. Posteriormente, mejorado por Emerson, se convirtió en el pilar del tratamiento de pacientes con parálisis respiratoria por poliomielitis, hasta la reintroducción de la ventilación con presión positiva en la década de 1950<sup>2</sup>. Cada epidemia de polio se acompañó de inversión tecnológica destinada a la mejora de estos ventiladores y con ello se salvaron miles de vidas en todo el mundo. El progreso en estas terapias, a lo largo de la historia de la medicina, ha puesto a la neumología en posición de poder enfrentarse a una de las pandemias más importantes del siglo XXI (Figura 1).

Aunque la mayoría de los pacientes con enfermedad por COVID-19 presentan una afectación leve o no complicada, aproximadamente el 15%<sup>3</sup> desarrollan una enfermedad grave que puede complicarse en síndrome de distrés respiratorio agudo (SDRA), pudiendo requerir ingreso en Unidad de Cuidados Intensivos (UCI) para intubación y ventilación invasiva. Durante los primeros momentos de la pandemia, ante el incremento exponencial de casos hospitalizados y el desconocimiento respecto al manejo de la enfermedad y las medidas de protección adecuadas, dichas unidades se vieron colapsadas. Hasta entonces, existía controversia sobre el empleo del SRNI en pandemias virales, ya que la evidencia científica disponible sólo recogía una clara indicación en las situaciones de insuficiencia respiratoria hipercápnica y/o en el edema agudo de pulmón<sup>4</sup>. No obstante, la experiencia acumulada de los neumólogos durante los primeros meses, sumada a su capacidad de reacción y de gestión de los limitados recursos disponibles, propiciaron un escenario apropiado para hacer frente a este reto epidemiológico sin precedentes. Basándose en las sucesivas actualizaciones científicas que surgían a nivel mundial, la Sociedad Española de Neumología y Cirugía Torácica (SEPAR), junto con otras tres sociedades científicas españolas especializadas en el manejo del paciente respiratorio crítico, elaboraron un documento de consenso sobre el SRNI en el adulto con Insuficiencia respiratoria aguda (IRA) secundaria a COVID-19<sup>5</sup>. Estas recomendaciones sirvieron como guía para identificar a los pacientes con IRA susceptibles de SRNI y elegir la estrategia de soporte más adecuada, pero también para establecer las medidas sobre prevención y control de la infección en los pacientes sometidos a dichas terapias. De esta forma, además de optimizar la atención, se asentaron las futuras líneas de investigación en relación a la COVID-19.

Por otro lado, durante las primeras olas de la pandemia, hubo una proliferación de las Unidades de Cuidados Respiratorios Intermedios (UCRIs). El tratamiento y monitorización de los pacientes con IRA grave y sin criterios de admisión en UCI por gravedad insuficiente o establecimiento de techo terapéutico (modelo step up) o la necesidad de espacio para pacientes dados de alta prematuramente de las UCI (step down) favorecieron el crecimiento de dichas unidades. Pasaron de 16, las pre-

existentes a la pandemia, a 41 a nivel nacional después de la misma y cada unidad, además, aumentó de forma significativa el número de camas disponibles<sup>6</sup>. Su dotación también tuvo que mejorarse, contando con dispositivos de SRNI y monitorización avanzados, así como equipos de técnicas aliadas como la ecografía, broncoscopia y CO<sub>2</sub> transcutánea. Fue necesario un incremento en la ratio enfermero/paciente respecto a la situación pre-pandemia y un aumento en el número de facultativos con turnos presenciales de al menos 12 h, con el fin de asegurar la atención y seguridad del paciente semicrítico ingresado en estas UCRI<sup>7</sup>. Se incorporó la figura del fisioterapeuta, con un papel fundamental tanto en el control de secreciones como en la recuperación temprana del aparato locomotor. Esta reestructuración y capacidad de transformación, permitió soportar la elevada carga asistencial con una atención de calidad dentro del complicado marco epidemiológico.

Con la evidencia acumulada durante la pandemia, se han ido definiendo las características fenotípicas de los pacientes con IRA secundaria a COVID-19, y con ello estableciendo las estrategias de tratamiento más apropiadas: cuándo sustituir la oxigenoterapia convencional por SRNI, qué tipo de terapia elegir, el papel de los métodos combinados, definiciones y actitudes hacia el fracaso del tratamiento y la mejora de los procedimientos tradicionales<sup>8</sup>. Pero también, se ha ido perfilando la organización logística y estructural en los servicios de neumología, y más concretamente en las UCRI<sup>9</sup>, cuya rentabilidad ya demostrada<sup>9</sup> ha quedado patente a lo largo de esta pandemia. Además, se han puesto en valor los conocimientos técnicos de los neumólogos en el manejo del SRNI.

Por ello, y con el objetivo de dar visibilidad a la necesidad manifiesta de que no haya ningún hospital en territorio nacional sin UCRI, SEPAR decidió dedicar el año 2022 a estas unidades<sup>10</sup>. El paciente respiratorio crítico va más allá del SDRA secundario a infección por COVID-19, una enfermedad que, por otro lado, corre el riesgo de endemizarse. La solvencia, rendimiento y eficiencia del soporte ofrecido en las UCRI<sup>9</sup>, así como la capacidad de liderazgo y adaptación de los servicios de neumología, convierten en necesaria la permanencia de forma estructural de este tipo de unidades, tanto en ámbito de aislamiento epidemiológico como fuera de él. De esta forma, se pretende llegar a cualquier paciente respiratorio semicrítico que pueda beneficiarse del ingreso y la atención en dichas unidades, evitando medidas más agresivas y costosas o por el contrario deficitarias. Así, con la iniciativa “ningún hospital sin UCRI”, se persigue crear una situación de igualdad asistencial a nivel de toda la geografía nacional, en la que el lugar de nacimiento no determine el acceso a una UCRI y los cuidados que en ésta se ofrecen.

### *Agradecimientos*

A David Díaz-Pérez por la cesión de la fotografía que aparece en la mitad superior de la figura 1.

### **BIBLIOGRAFÍA**

1. Tobin MJ. Principles and Practice of Mechanical Ventilation. 2nd ed. Nueva York: McGraw-Hill; 2006: 1-31.

2. Rodríguez AG. Historia de la Ventilación Mecánica. Rev Arg de Ter Int. [Internet]. 12 de junio de 2012 [citado 13 de septiembre de 2022]; 29(1). Disponible en: <https://revista.sati.org.ar/index.php/MI/article/view/30>.
3. Guan WJ, Ni ZY, Hu Y, Liang WH, Ou CQ, He JX, et al; China Medical Treatment Expert Group for Covid-19. Clinical Characteristics of Coronavirus Disease 2019 in China. N Engl J Med. 2020 Apr 30;382(18):1708-1720. doi: 10.1056/NEJMoa2002032.
4. Rochwerg B, Brochard L, Elliott MW, Hess D, Hill NS, Nava S, et al; Members Of The Task Force. Official ERS/ATS clinical practice guidelines: noninvasive ventilation for acute respiratory failure. Eur Respir J. 2017 Aug 31;50(2):1602426. doi: 10.1183/13993003.02426-2016.
5. Cinesi Gómez C, Peñuelas Rodríguez Ó, Luján Torné M, Egea Santaolalla C, Masa Jiménez JF, García Fernández J, et al. Recomendaciones de consenso respecto al soporte respiratorio no invasivo en el paciente adulto con insuficiencia respiratoria aguda secundaria a infección por SARS-CoV-2. Arch Bronconeumol. 2020 Jul;56:11-18.. doi: 10.1016/j.arbres.2020.03.005.
6. Candela Caballero-Erasoa, Sarah Heili, Olga Mediano. Adaptación de los servicios de neumología frente a la COVID-19: el papel de las unidades de cuidados respiratorios intermedios en España. *Open Respiratory Archives*. 2020;2(4):297–305. doi: [10.1016/j.opresp.2020.10.002](https://doi.org/10.1016/j.opresp.2020.10.002)
7. Caballero-Eraso C, Pascual Martínez N, Mediano O, Egea Santaolalla C. Unidad de Cuidados Respiratorios Intermedios (UCRI) en la pandemia COVID-19 en España. La realidad. Arch Bronconeumol. 2022 Mar;58(3):284-286. doi: 10.1016/j.arbres.2021.10.004.
8. Luján M, Sayas J, Mediano O, Egea C. Non-invasive Respiratory Support in COVID-19: A Narrative Review. Front Med (Lausanne). 2022 Jan 4;8:788190. doi: 10.3389/fmed.2021.788190.
9. Heili-Frades S, Carballosa de Miguel MDP, Naya Prieto A, Galdeano Lozano M, Mate García x, Mahillo Fernández I, et al. Análisis de costes y mortalidad de una unidad de cuidados intermedios respiratorios ¿Es realmente eficiente y segura? Arch Bronconeumol. 2019;55:634–41, <http://dx.doi.org/10.1016/j.arbres.2019.06.008>.)
10. SEPAR contenidos. Ningún hospital sin UCRI, <http://separcontenidos.es/ningunhospitalsinUCRI/>; 2022 [consultada el 13 de septiembre de 2022].

### **PIE DE PÁGINA de la FIGURA 1**

Comparativa entre el primer respirador de soporte no invasivo, "pulmón de acero", y un respirador actual de última generación (Philips V60 Plus).

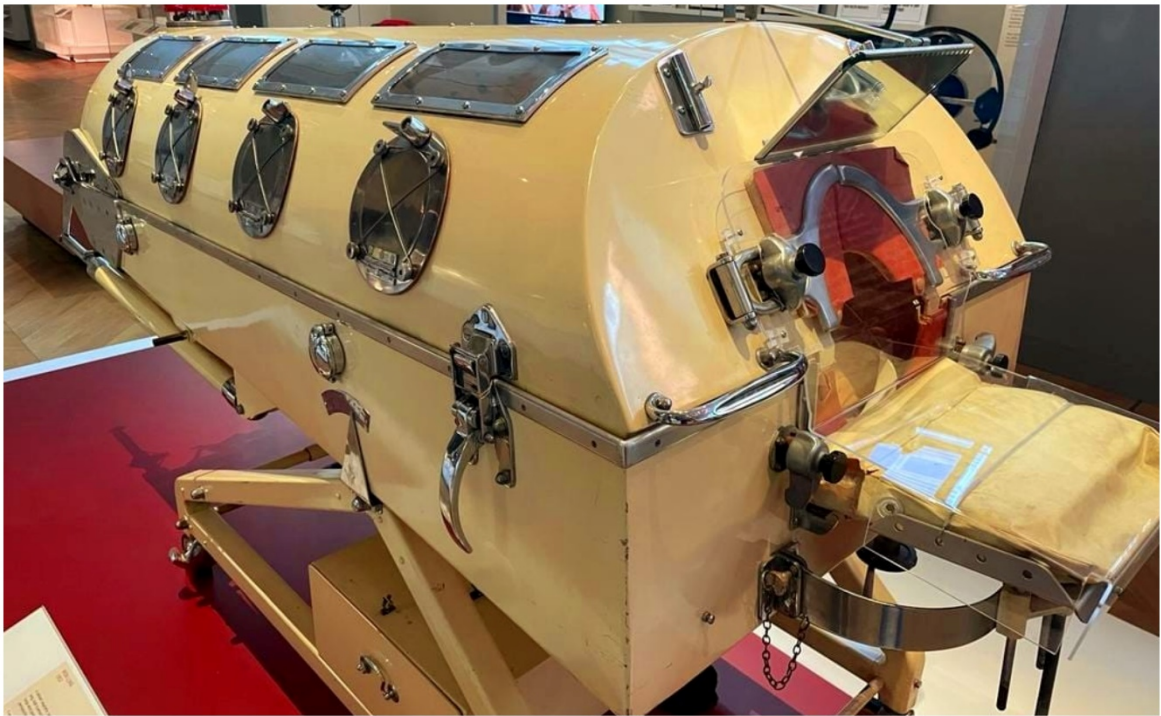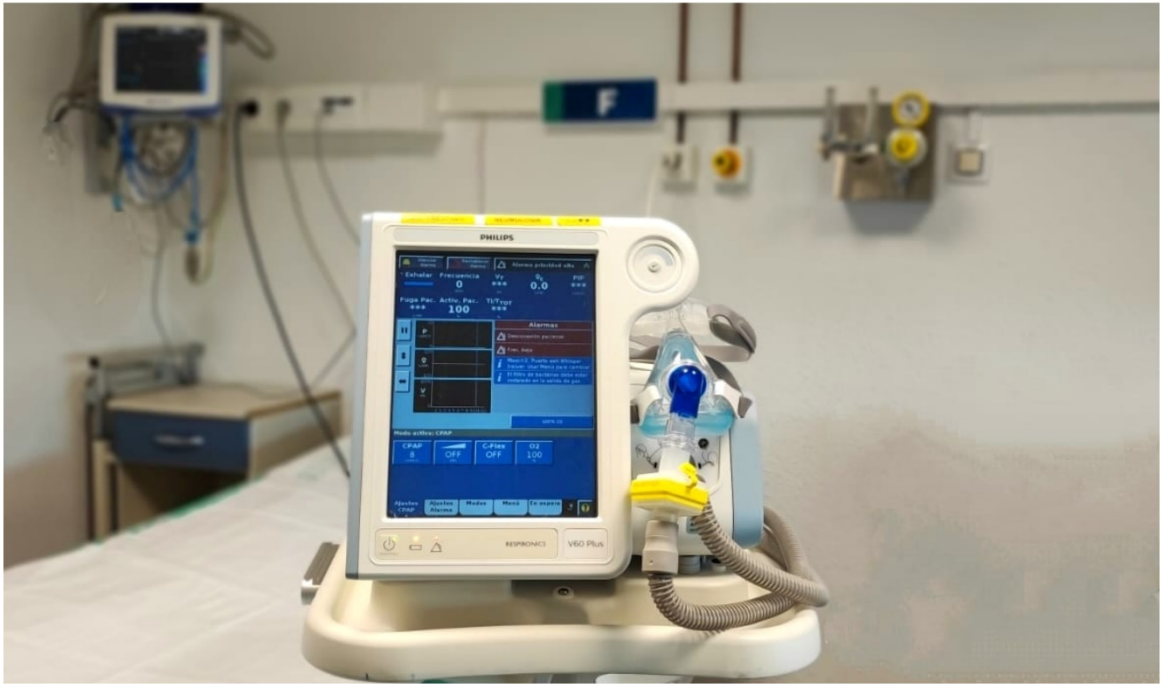

Supplement: mmc1 [file S0300289622005877:mmc1.pdf]
